# Supplementary material
Source: PubMed Central journal article supplement (PMC3367831)
Supplement: supp_125.3.695_JCS084400FigS1.pdf [file supp_125.3.695_JCS084400FigS1.pdf]

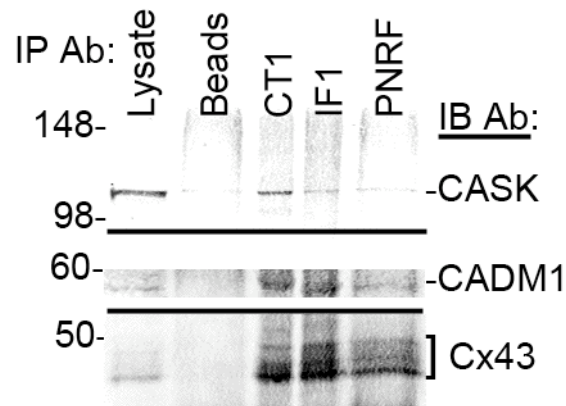

**Supplementary Figure: Co-immunoprecipitation of CASK/Lin-2 and a band corresponding to CADM1 by 3 different Cx43 antibodies (CT1, IF1 and PNRF). After immunoprecipitation with the respective antibodies and SDS-PAGE the blot was cut into pieces and the parts incubated with the different antibodies. Negative (beads alone) and positive (cell lysate) controls are included. The CADM1 band identification is to be considered tentative as it has been shown to display a wide range of sizes in SDS-PAGE due to different glycosylation states.**
